# Supplementary material for: Nascent RNA sequencing reveals a dynamic global transcriptional response at genes and enhancers to the natural medicinal compound celastrol
Source: HighWire-hosted journal article supplement (doi:10.1101/gr.222935.117), 2017-10-12
Supplement: Supplemental_Tables_S1_to_S2.docx [file Supplemental_Tables_S1_to_S2.docx]

# Supplemental Tables

| ID | TF | F | p |
| --- | --- | --- | --- |
| D00504.005 | MAX | 50.797 | 0.019 |
| D00328.018 | CTCF | 30.308 | 0.032 |
| D00471.002 | HSF2 | 25.546 | 0.038 |
| D00470.005 | HSF1 | 23.697 | 0.041 |
| D00619.003 | RFX5 | 18.010 | 0.054 |
| D00363.003 | ELK4 | 15.565 | 0.062 |
| D00760.003 | FOS | 13.859 | 0.069 |
| D00660.005 | SRF | 13.254 | 0.072 |
| D00587.002 | POU2F1 | 12.532 | 0.076 |
| D00789.003 | NFYB | 12.288 | 0.077 |
| D00382.003 | ETV4 | 12.024 | 0.079 |
| D00347.005 | E2F4 | 10.988 | 0.086 |
| D00687.001 | TFEB | 10.826 | 0.087 |
| D00384.002 | ETV6 | 10.772 | 0.088 |
| D00318.001 | CEBPD | 9.381 | 0.100 |
| D00785.001 | MYC | 9.318 | 0.100 |
| D00710.007 | YY1 | 9.250 | 0.101 |
| D00363.004 | ELK4 | 8.557 | 0.109 |
| D00535.004 | NFE2 | 7.924 | 0.117 |
| D00650.005 | SP1 | 7.861 | 0.118 |
| D00776.005 | JUND | 7.743 | 0.119 |
| D00423.005 | GMEB2 | 7.530 | 0.122 |
| D00317.003 | CEBPB | 7.190 | 0.128 |
| D00817.001 | TBP | 6.999 | 0.131 |
| D00799.001 | REST | 6.966 | 0.132 |
| D00379.001 | ETV1 | 6.805 | 0.134 |
| D00756.007 | EZH2 | 6.414 | 0.142 |
| D00560.003 | NRL | 6.356 | 0.143 |
| D00821.001 | TRIM28 | 6.209 | 0.146 |
| D00559.001 | NRF1 | 6.150 | 0.147 |
| D00777.002 | JUN | 5.978 | 0.151 |
| D00409.004 | GABPA | 5.954 | 0.152 |
| D00700.001 | USF1 | 5.871 | 0.154 |
| D00616.002 | RFX3 | 5.643 | 0.159 |
| D00686.002 | TFE3 | 5.532 | 0.162 |
| D00822.001 | UBTF | 5.518 | 0.162 |
| D00356.010 | ELF1 | 5.463 | 0.164 |
| D00504.002 | MAX | 5.300 | 0.168 |
| D00487.003 | JDP2 | 5.263 | 0.169 |
| D00808.004 | SMC3 | 5.172 | 0.172 |
| D00739.001 | ATF3 | 5.068 | 0.175 |
| D00796.001 | RAD21 | 5.002 | 0.177 |
| D00815.001 | TAL1 | 4.944 | 0.179 |
| D00813.009 | TAF1 | 4.708 | 0.187 |
| D00442.003 | HMX3 | 4.659 | 0.189 |
| D00501.003 | MAFF | 4.555 | 0.192 |
| D00825.001 | ZBTB33 | 4.538 | 0.193 |
| D00501.004 | MAFF | 4.479 | 0.195 |
| D00507.002 | MEF2D | 4.397 | 0.198 |
| D00709.002 | XBP1 | 4.384 | 0.199 |
| D00768.001 | GTF2F1 | 4.339 | 0.201 |
| D00766.002 | GATA2 | 4.274 | 0.203 |
| ID | **TF** | **F** | **p** |
| D00816.001 | TBL1XR1 | 4.270 | 0.204 |
| D00672.001 | TCF3 | 4.136 | 0.209 |
| D00417.005 | GCM1 | 4.105 | 0.211 |
| D00748.001 | CBX3 | 4.040 | 0.213 |
| D00755.003 | EP300 | 3.828 | 0.224 |
| D00606.002 | PRRX2 | 3.808 | 0.225 |
| D00761.001 | FOXA1 | 3.776 | 0.226 |
| D00755.005 | EP300 | 3.744 | 0.228 |
| D00805.001 | SIRT6 | 3.673 | 0.232 |
| D00613.002 | RAX | 3.500 | 0.241 |
| D00780.001 | KDM5B | 3.396 | 0.247 |
| D00394.003 | FOXD2 | 3.370 | 0.249 |
| D00505.003 | MEF2A | 3.355 | 0.250 |
| D00361.001 | ELK3 | 3.327 | 0.252 |
| D00433.003 | HEY2 | 3.250 | 0.257 |
| D00753.001 | CTCFL | 3.245 | 0.257 |
| D00807.001 | SMARCB1 | 3.199 | 0.260 |
| D00292.001 | ALX4 | 3.111 | 0.266 |
| D00582.001 | PITX3 | 3.069 | 0.269 |
| D00700.006 | USF1 | 3.043 | 0.271 |
| D00765.001 | GATA1 | 3.042 | 0.271 |
| D00483.001 | IRX5 | 2.998 | 0.274 |
| D00537.001 | NFIB | 2.943 | 0.278 |
| D00758.001 | FOSL1 | 2.931 | 0.279 |
| D00685.003 | TFCP2 | 2.895 | 0.282 |
| D00475.006 | IRF3 | 2.836 | 0.287 |
| D00503.014 | MAFK | 2.809 | 0.289 |
| D00323.002 | CPEB1 | 2.796 | 0.290 |
| D00492.003 | LEF1 | 2.773 | 0.292 |
| D00317.009 | CEBPB | 2.697 | 0.299 |
| D00714.003 | ZBTB7A | 2.633 | 0.304 |
| D00353.005 | EGR2 | 2.613 | 0.306 |
| D00383.002 | ETV5 | 2.548 | 0.312 |
| D00546.003 | NKX3-1 | 2.466 | 0.320 |
| D00673.001 | TCF4 | 2.465 | 0.321 |
| D00395.002 | FOXD3 | 2.447 | 0.322 |
| D00824.001 | WRNIP1 | 2.427 | 0.324 |
| D00632.001 | SHOX2 | 2.382 | 0.329 |
| D00630.003 | SCRT1 | 2.299 | 0.338 |
| D00626.005 | RXRA | 2.263 | 0.342 |
| D00356.005 | ELF1 | 2.259 | 0.343 |
| D00404.002 | FOXO1 | 2.255 | 0.343 |
| D00762.001 | FOXA2 | 2.242 | 0.345 |
| D00592.003 | POU3F2 | 2.200 | 0.350 |
| D00691.001 | TGIF2 | 2.175 | 0.353 |
| D00421.003 | GLIS2 | 2.171 | 0.353 |
| D00787.002 | NFIC | 2.131 | 0.358 |
| D00581.002 | PITX1 | 2.078 | 0.365 |
| D00490.003 | KLF16 | 2.037 | 0.371 |
| D00468.003 | HOXD8 | 2.018 | 0.373 |
| D00660.007 | SRF | 2.017 | 0.373 |
| D00779.001 | KDM5A | 2.001 | 0.376 |
| ID | **TF** | **F** | **p** |
| D00538.001 | NFIL3 | 1.962 | 0.381 |
| D00678.001 | TEAD3 | 1.895 | 0.391 |
| D00559.006 | NRF1 | 1.872 | 0.394 |
| D00677.003 | TEAD1 | 1.841 | 0.399 |
| D00774.001 | IKZF1 | 1.815 | 0.403 |
| D00324.003 | CREB3L1 | 1.812 | 0.404 |
| D00818.003 | TCF12 | 1.807 | 0.404 |
| D00626.009 | RXRA | 1.768 | 0.411 |
| D00409.003 | GABPA | 1.729 | 0.417 |
| D00512.001 | MEIS3 | 1.723 | 0.418 |
| D00326.002 | CREB3 | 1.702 | 0.422 |
| D00601.003 | PRDM4 | 1.693 | 0.424 |
| D00398.001 | FOXJ2 | 1.675 | 0.427 |
| D00663.002 | TBX15 | 1.659 | 0.430 |
| D00293.003 | ARNTL | 1.604 | 0.440 |
| D00654.003 | SPDEF | 1.603 | 0.440 |
| D00408.003 | FOXP3 | 1.601 | 0.440 |
| D00680.001 | TEF | 1.595 | 0.441 |
| D00600.004 | PRDM1 | 1.562 | 0.448 |
| D00752.001 | CTBP2 | 1.556 | 0.449 |
| D00812.001 | SUZ12 | 1.544 | 0.451 |
| D00345.002 | E2F2 | 1.542 | 0.452 |
| D00328.003 | CTCF | 1.457 | 0.469 |
| D00577.002 | PAX9 | 1.450 | 0.471 |
| D00523.003 | MSC | 1.444 | 0.472 |
| D00782.001 | MEF2C | 1.441 | 0.473 |
| D00529.004 | MYBL2 | 1.409 | 0.480 |
| D00529.001 | MYBL2 | 1.404 | 0.481 |
| D00405.003 | FOXO3 | 1.394 | 0.483 |
| D00653.003 | SP8 | 1.379 | 0.487 |
| D00488.003 | KLF13 | 1.376 | 0.487 |
| D00407.003 | FOXO6 | 1.349 | 0.493 |
| D00652.004 | SP4 | 1.340 | 0.495 |
| D00769.001 | HDAC1 | 1.333 | 0.497 |
| D00368.007 | EN2 | 1.328 | 0.498 |
| D00304.003 | BATF3 | 1.326 | 0.499 |
| D00763.001 | FOXM1 | 1.326 | 0.499 |
| D00321.003 | CENPB | 1.323 | 0.500 |
| D00320.001 | CEBPG | 1.285 | 0.509 |
| D00364.002 | EMX1 | 1.268 | 0.513 |
| D00547.003 | NKX3-2 | 1.261 | 0.515 |
| D00540.002 | NFKB1 | 1.252 | 0.517 |
| D00406.002 | FOXO4 | 1.252 | 0.517 |
| D00614.001 | RFX2 | 1.242 | 0.520 |
| D00552.006 | NR2C2 | 1.217 | 0.526 |
| D00631.002 | SCRT2 | 1.196 | 0.532 |
| D00750.001 | CHD1 | 1.182 | 0.536 |
| D00539.001 | NFIX | 1.181 | 0.536 |
| D00788.001 | NFYA | 1.178 | 0.537 |
| D00770.002 | HDAC2 | 1.172 | 0.538 |
| D00704.001 | VDR | 1.168 | 0.540 |
| D00344.005 | E2F1 | 1.139 | 0.548 |
| D00508.004 | MEIS1 | 1.124 | 0.552 |
| D00430.003 | HES7 | 1.106 | 0.557 |
| D00810.001 | STAT3 | 1.101 | 0.559 |
| ID | **TF** | **F** | **p** |
| D00744.001 | BCLAF1 | 1.095 | 0.561 |
| D00349.002 | E2F8 | 1.064 | 0.570 |
| D00652.003 | SP4 | 1.064 | 0.570 |
| D00575.003 | PAX6 | 1.058 | 0.572 |
| D00459.003 | HOXC10 | 1.034 | 0.579 |
| D00461.003 | HOXC12 | 1.030 | 0.581 |
| D00619.007 | RFX5 | 1.013 | 0.586 |
| D00783.001 | MTA3 | 1.000 | 0.590 |
| D00809.002 | SP2 | 0.993 | 0.593 |
| D00340.003 | DMBX1 | 0.990 | 0.594 |
| D00651.003 | SP3 | 0.989 | 0.594 |
| D00746.004 | BHLHE40 | 0.977 | 0.598 |
| D00429.003 | HES5 | 0.966 | 0.602 |
| D00335.003 | DLX2 | 0.947 | 0.608 |
| D00692.002 | THRA | 0.938 | 0.611 |
| D00329.002 | CUX1 | 0.934 | 0.613 |
| D00689.003 | TGIF1 | 0.924 | 0.616 |
| D00416.005 | GBX2 | 0.918 | 0.618 |
| D00655.002 | SPI1 | 0.901 | 0.625 |
| D00381.003 | ETV3 | 0.884 | 0.631 |
| D00771.001 | HDAC6 | 0.879 | 0.633 |
| D00396.003 | FOXG1 | 0.872 | 0.635 |
| D00819.002 | TCF7L2 | 0.859 | 0.640 |
| D00435.003 | HIC2 | 0.842 | 0.647 |
| D00503.004 | MAFK | 0.839 | 0.648 |
| D00348.003 | E2F7 | 0.835 | 0.649 |
| D00533.003 | NFAT5 | 0.829 | 0.651 |
| D00558.002 | NR4A2 | 0.828 | 0.652 |
| D00655.006 | SPI1 | 0.799 | 0.664 |
| D00370.003 | ERF | 0.781 | 0.671 |
| D00522.002 | MNX1 | 0.779 | 0.671 |
| D00591.002 | POU3F1 | 0.772 | 0.674 |
| D00351.001 | EGR1 | 0.769 | 0.676 |
| D00299.003 | ATF7 | 0.761 | 0.679 |
| D00510.003 | MEIS2 | 0.758 | 0.680 |
| D00801.001 | SAP30 | 0.729 | 0.693 |
| D00794.047 | POLR2A | 0.728 | 0.693 |
| D00542.005 | NHLH1 | 0.709 | 0.701 |
| D00366.003 | EN1 | 0.705 | 0.703 |
| D00424.002 | GRHL1 | 0.704 | 0.703 |
| D00611.001 | RARG | 0.695 | 0.707 |
| D00710.002 | YY1 | 0.678 | 0.715 |
| D00740.002 | BACH1 | 0.667 | 0.720 |
| D00695.002 | TP63 | 0.636 | 0.735 |
| D00441.003 | HMX2 | 0.626 | 0.739 |
| D00759.001 | FOSL2 | 0.609 | 0.748 |
| D00412.002 | GATA5 | 0.606 | 0.749 |
| D00681.002 | TFAP2A | 0.600 | 0.752 |
| D00775.001 | JUNB | 0.588 | 0.758 |
| D00600.001 | PRDM1 | 0.568 | 0.767 |
| D00741.001 | BATF | 0.560 | 0.772 |
| D00642.003 | SOX18 | 0.547 | 0.778 |
| D00541.001 | NFKB2 | 0.545 | 0.779 |
| D00565.002 | ONECUT2 | 0.540 | 0.782 |
| D00524.002 | MSX1 | 0.532 | 0.786 |
| ID | **TF** | **F** | **p** |
| D00754.003 | E2F6 | 0.519 | 0.793 |
| D00747.001 | BRCA1 | 0.513 | 0.796 |
| D00337.001 | DLX4 | 0.499 | 0.803 |
| D00351.006 | EGR1 | 0.497 | 0.804 |
| D00318.004 | CEBPD | 0.488 | 0.809 |
| D00635.001 | SMAD3 | 0.480 | 0.813 |
| D00489.002 | KLF14 | 0.477 | 0.814 |
| D00519.002 | MLXIPL | 0.469 | 0.819 |
| D00401.003 | FOXK1 | 0.467 | 0.820 |
| D00484.003 | ISL2 | 0.456 | 0.826 |
| D00516.002 | MESP1 | 0.454 | 0.827 |
| D00664.002 | TBX19 | 0.450 | 0.829 |
| D00705.003 | VENTX | 0.443 | 0.833 |
| D00772.001 | HMGN3 | 0.418 | 0.847 |
| D00713.003 | ZBTB49 | 0.411 | 0.850 |
| D00583.002 | PKNOX1 | 0.410 | 0.851 |
| D00743.001 | BCL3 | 0.409 | 0.852 |
| D00662.003 | TBR1 | 0.406 | 0.853 |
| D00506.003 | MEF2B | 0.399 | 0.857 |
| D00393.003 | FOXC2 | 0.356 | 0.881 |
| D00784.004 | MXI1 | 0.348 | 0.885 |
| D00595.001 | POU4F1 | 0.344 | 0.888 |
| D00495.003 | LHX6 | 0.340 | 0.890 |
| D00749.001 | CCNT2 | 0.334 | 0.893 |
| D00792.001 | PHF8 | 0.322 | 0.900 |
| D00665.002 | TBX1 | 0.317 | 0.902 |
| D00599.006 | POU6F2 | 0.317 | 0.902 |
| D00767.001 | GTF2B | 0.316 | 0.903 |

| ID | TF | F | p |
| --- | --- | --- | --- |
| D00802.001 | SETDB1 | 0.313 | 0.905 |
| D00681.004 | TFAP2A | 0.291 | 0.916 |
| D00478.003 | IRF7 | 0.278 | 0.923 |
| D00344.002 | E2F1 | 0.271 | 0.927 |
| D00790.001 | NR2F2 | 0.269 | 0.928 |
| D00556.003 | NR3C1 | 0.264 | 0.930 |
| D00535.003 | NFE2 | 0.251 | 0.937 |
| D00432.003 | HEY1 | 0.245 | 0.940 |
| D00410.009 | GATA3 | 0.223 | 0.950 |
| D00351.009 | EGR1 | 0.215 | 0.954 |
| D00623.003 | RUNX2 | 0.195 | 0.963 |
| D00347.003 | E2F4 | 0.189 | 0.965 |
| D00552.002 | NR2C2 | 0.180 | 0.969 |
| D00517.002 | MGA | 0.179 | 0.970 |
| D00346.003 | E2F3 | 0.177 | 0.971 |
| D00410.003 | GATA3 | 0.164 | 0.975 |
| D00305.003 | BCL6B | 0.163 | 0.976 |
| D00418.003 | GCM2 | 0.153 | 0.979 |
| D00650.007 | SP1 | 0.153 | 0.979 |
| D00745.001 | BDP1 | 0.129 | 0.987 |
| D00791.001 | PBX3 | 0.123 | 0.988 |
| D00505.006 | MEF2A | 0.115 | 0.990 |
| D00797.001 | RBBP5 | 0.102 | 0.993 |
| D00536.003 | NFIA | 0.097 | 0.994 |
| D00793.002 | PML | 0.080 | 0.997 |
| D00475.003 | IRF3 | 0.078 | 0.997 |
| D00528.001 | MYBL1 | 0.077 | 0.997 |
| D00679.004 | TEAD4 | 0.064 | 0.998 |
| D00431.002 | HESX1 | 0.040 | 1.000 |

**Supplemental Table 1.** **Distribution of marginal F-statistics and p-values for each motif in the TF regression using DeepBind scores.** F-statistics were computed per motif scores (there may be multiple motifs for the same TF), summing over the effects across all time points.

| **TF** | **F** | **p** |
| --- | --- | --- |
| **POLR2A** | 227.557 | 0.004 |
| **MYC** | 77.607 | 0.013 |
| **RFX1** | 67.379 | 0.015 |
| **TBP** | 49.346 | 0.02 |
| **CCNT2** | 45.771 | 0.022 |
| **UBTF** | 43.564 | 0.023 |
| **RAD21** | 40.791 | 0.024 |
| **E2F4** | 35.087 | 0.028 |
| **PHF8** | 34.816 | 0.028 |
| **SP1** | 32.535 | 0.03 |
| **PML** | 30.307 | 0.032 |
| **MXI1** | 30.161 | 0.032 |
| **SUZ12** | 25.285 | 0.039 |
| **CHAMP1** | 25.205 | 0.039 |
| **RCOR1** | 24.193 | 0.04 |
| **MLLT1** | 23.544 | 0.041 |
| **MAX** | 23.034 | 0.042 |
| **SAP30** | 21.861 | 0.044 |
| **C11orf30** | 21.021 | 0.046 |
| **NFYA** | 20.52 | 0.047 |
| **HDAC1** | 18.548 | 0.052 |
| **ZBTB40** | 16.603 | 0.058 |
| **ZBTB33** | 16.128 | 0.06 |
| **ESRRA** | 15.921 | 0.06 |
| **NFYB** | 15.701 | 0.061 |
| **ZNF318** | 15.505 | 0.062 |
| **GTF2B** | 12.927 | 0.074 |
| **ELF1** | 12.853 | 0.074 |
| **ATF1** | 12.847 | 0.074 |
| **RAD51** | 12.275 | 0.077 |
| **TRIM24** | 12.031 | 0.079 |
| **YY1** | 11.847 | 0.08 |
| **L3MBTL2** | 11.428 | 0.083 |
| **SMAD5** | 11.238 | 0.084 |
| **COPS2** | 10.561 | 0.089 |
| **RBBP5** | 10.453 | 0.09 |
| **CREM** | 9.681 | 0.097 |
| **IRF2** | 9.614 | 0.098 |
| **CEBPZ** | 9.221 | 0.101 |
| **TAF1** | 9.007 | 0.104 |
| **BMI1** | 8.147 | 0.114 |
| **MAZ** | 8.117 | 0.114 |
| **GABPA** | 7.551 | 0.122 |
| **NFE2** | 7.456 | 0.124 |
| **BACH1** | 7.23 | 0.127 |
| **TEAD4** | 7.063 | 0.13 |
| **YBX1** | 7.036 | 0.13 |
| **USF1** | 7.01 | 0.131 |
| **TARDBP** | 6.575 | 0.139 |
| **GATA1** | 6.555 | 0.139 |
| **NRF1** | 6.526 | 0.14 |
| **HDAC2** | 6.236 | 0.145 |
| **TF** | **F** | **p** |
| **FOXK2** | 6.229 | 0.146 |
| **ATF3** | 6.211 | 0.146 |
| **CHD1** | 6.204 | 0.146 |
| **GTF3C2** | 6.085 | 0.149 |
| **PKNOX1** | 5.995 | 0.151 |
| **CTCFL** | 5.992 | 0.151 |
| **SIN3A** | 5.883 | 0.153 |
| **SMARCA4** | 5.754 | 0.156 |
| **SMARCA5** | 5.745 | 0.157 |
| **GATA2** | 5.699 | 0.158 |
| **SREBF1** | 5.633 | 0.159 |
| **MAFK** | 5.509 | 0.163 |
| **SIX5** | 5.489 | 0.163 |
| **TAF7** | 5.448 | 0.164 |
| **ZNF143** | 5.369 | 0.166 |
| **SP2** | 5.012 | 0.177 |
| **EP300** | 4.948 | 0.179 |
| **BDP1** | 4.897 | 0.181 |
| **CTCF** | 4.893 | 0.181 |
| **RNF2** | 4.806 | 0.184 |
| **SRF** | 4.776 | 0.185 |
| **KDM5B** | 4.733 | 0.186 |
| **ZBTB7A** | 4.667 | 0.188 |
| **ZHX1** | 4.463 | 0.196 |
| **FOS** | 4.128 | 0.21 |
| **TRIM28** | 3.988 | 0.216 |
| **EGR1** | 3.986 | 0.216 |
| **ZBTB11** | 3.936 | 0.218 |
| **CEBPB** | 3.895 | 0.22 |
| **E2F6** | 3.848 | 0.223 |
| **NFRKB** | 3.776 | 0.226 |
| **CDC5L** | 3.734 | 0.228 |
| **DPF2** | 3.593 | 0.236 |
| **GTF2F1** | 3.481 | 0.242 |
| **SETDB1** | 3.421 | 0.246 |
| **EZH2** | 3.336 | 0.251 |
| **HDGF** | 3.075 | 0.268 |
| **SMARCB1** | 2.94 | 0.278 |
| **CBX3** | 2.873 | 0.284 |
| **RUNX1** | 2.865 | 0.284 |
| **POLR3G** | 2.811 | 0.289 |
| **HDAC6** | 2.659 | 0.302 |
| **ARID3A** | 2.642 | 0.303 |
| **NR2F6** | 2.586 | 0.309 |
| **NR2C2** | 2.578 | 0.309 |
| **CHD2** | 2.409 | 0.326 |
| **SPI1** | 2.389 | 0.328 |
| **NBN** | 2.352 | 0.332 |
| **DDX20** | 2.215 | 0.348 |
| **IKZF1** | 2.21 | 0.349 |
| **REST** | 2.151 | 0.356 |
| **MEF2A** | 2.068 | 0.366 |
| **STAT5A** | 2.015 | 0.374 |
| **TF** | **F** | **p** |
| **TCF7** | 2.007 | 0.375 |
| **MAFF** | 1.979 | 0.379 |
| **BCLAF1** | 1.925 | 0.386 |
| **POLR3A** | 1.907 | 0.389 |
| **BHLHE40** | 1.894 | 0.391 |
| **MIER1** | 1.861 | 0.396 |
| **YBX3** | 1.794 | 0.407 |
| **KDM1A** | 1.77 | 0.41 |
| **MYNN** | 1.739 | 0.416 |
| **THAP1** | 1.557 | 0.449 |
| **MCM3** | 1.498 | 0.461 |
| **JUN** | 1.469 | 0.467 |
| **ZEB2** | 1.459 | 0.469 |
| **SMC3** | 1.408 | 0.48 |
| **ETV6** | 1.375 | 0.487 |
| **KLF16** | 1.33 | 0.498 |
| **HES1** | 1.304 | 0.504 |
| **TAL1** | 1.302 | 0.505 |
| **BCOR** | 1.235 | 0.522 |
| **TBL1XR1** | 1.186 | 0.535 |
| **ELK1** | 1.181 | 0.536 |
| **SMARCE1** | 1.064 | 0.57 |
| **CBX5** | 1.043 | 0.577 |
| **NR2F2** | 1.016 | 0.585 |
| **ZMIZ1** | 0.945 | 0.609 |
| **FOSL1** | 0.92 | 0.618 |
| **MCM7** | 0.854 | 0.642 |
| **MBD2** | 0.846 | 0.645 |
| **ZNF24** | 0.838 | 0.648 |
| **DEAF1** | 0.833 | 0.65 |
| **MITF** | 0.788 | 0.668 |
| **MCM5** | 0.781 | 0.671 |
| **SMAD2** | 0.762 | 0.678 |
| **ARNT** | 0.729 | 0.692 |
| **BRF2** | 0.68 | 0.714 |
| **JUNB** | 0.675 | 0.717 |
| **NCOA1** | 0.636 | 0.735 |
| **ZNF274** | 0.619 | 0.742 |
| **KAT8** | 0.598 | 0.753 |
| **JUND** | 0.583 | 0.76 |
| **MTA2** | 0.361 | 0.878 |
| **SIRT6** | 0.358 | 0.88 |
| **USF2** | 0.349 | 0.885 |
| **ZNF263** | 0.202 | 0.96 |
| **LEF1** | 0.141 | 0.983 |
| **CBX1** | 0.128 | 0.987 |
| **ZKSCAN1** | 0.117 | 0.99 |
| **RFX5** | 0.035 | 1 |
| **HMBOX1** | 0 | 1 |
| **HMGN3** | 0 | 1 |
| **KDM4B** | 0 | 1 |

**Supplemental Table 2.** **Distribution of the marginal F-statistics and p-values for each motif in the TF regression using ChIP-seq scores.** F-statistics were computed per motif scores (there may be multiple motifs for the same TF), summing over the effects across all time points.
